# Supplementary material
Source: MDPI journal article supplement (https://www.mdpi.com/2308-3417/3/4/73)

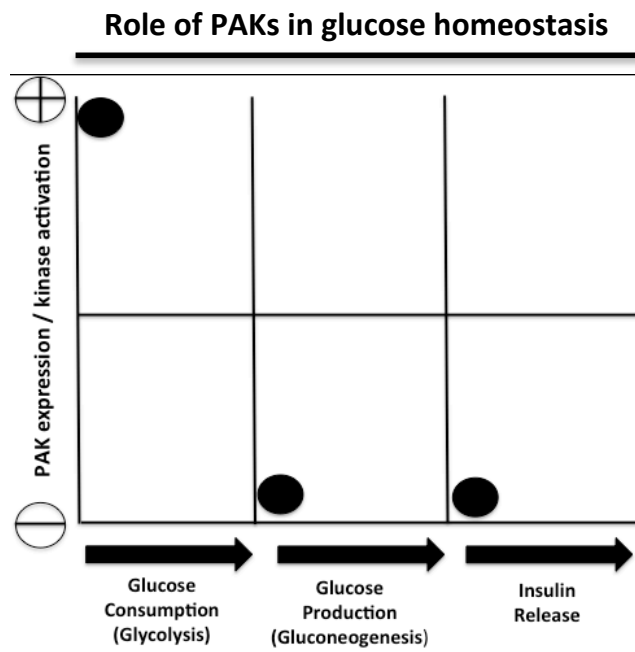

**Supplementary Figure 2. Diverse roles of PAK in glucose homeostasis.**

Supplement: s1 [file s1]

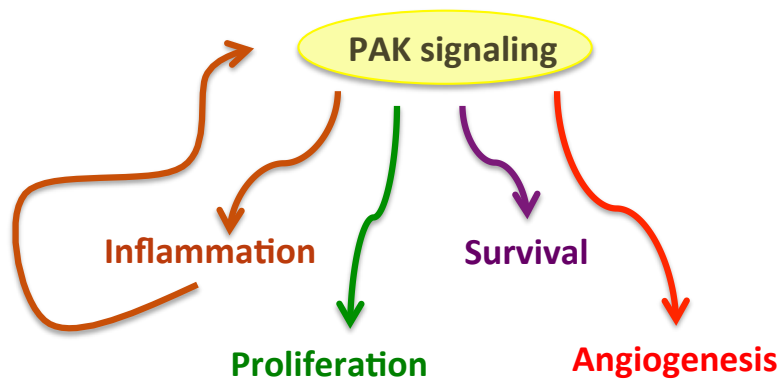

**Supplementary Figure 3. PAK signaling in disease.**

Supplement: s1 [file s1]
